# Supplementary material for: Uncoupled phytoplankton-bacterioplankton relationship by multiple drivers interacting at different temporal scales in a high-mountain Mediterranean lake
Source: PubMed Central journal article supplement (PMC6962384; doi:10.1038/s41598-019-57269-y), 2020-01-15
Supplement: 41598_2019_57269_MOESM1_ESM.pdf [file 41598_2019_57269_MOESM1_ESM.pdf]

1 Supporting information for

2 **Uncoupled phytoplankton-bacterioplankton relationship by multiple drivers interacting**

3 **at different temporal scales in a high-mountain Mediterranean lake**

4 Cristina Durán-Romero, Juan Manuel Medina-Sánchez, Presentación Carrillo\*

5 \*Corresponding author: [pcl@ugr.es](mailto:pcl@ugr.es)

| Variable                                     |                    |
|----------------------------------------------|--------------------|
| TN ( $\mu\text{mol L}^{-1}$ )                | $22.80 \pm 7.60$   |
| TP ( $\mu\text{mol L}^{-1}$ )                | $0.11 \pm 0.05$    |
| SRP ( $\mu\text{mol L}^{-1}$ )               | $0.06 \pm 0.001$   |
| DIN ( $\mu\text{mol L}^{-1}$ )               | $14.60 \pm 7.30$   |
| DIN:TP ( $\mu\text{mol}$ )                   | $142.10 \pm 27.12$ |
| DOC ( $\mu\text{mol L}^{-1}$ )               | $72.12 \pm 16.21$  |
| Chl <i>a</i> ( $\mu\text{g L}^{-1}$ )        | $3.09 \pm 0.04$    |
| N:P <sub>sestonic</sub>                      | $40.90 \pm 7.40$   |
| PA ( $\text{cell mL}^{-1}$ ) $\times 10^3$   | $4.88 \pm 1.61$    |
| PP ( $\mu\text{gC L}^{-1} \text{h}^{-1}$ )   | $2.02 \pm 0.43$    |
| BA ( $\text{cell mL}^{-1}$ ) $\times 10^5$   | $5.76 \pm 2.13$    |
| HBP ( $\mu\text{g C L}^{-1} \text{h}^{-1}$ ) | $0.067 \pm 0.005$  |

6 **Table 1S.** Mean values ( $\pm$  standard deviation) of the main chemical and biological variables  
7 studied in the water column under the initial conditions of the experiment. TN: total  
8 nitrogen; TP: total phosphorus; SRP: soluble reactive phosphorus; DIN: dissolved inorganic  
9 nitrogen; DOC: dissolved organic carbon; Chl *a*: chlorophyll *a*; N:P<sub>sestonic</sub>: nitrogen to  
10 phosphorus ratio of the seston on a molar basis; PA: phytoplanktonic abundance; PP: primary  
11 production; BA: bacterial abundance; HBP: heterotrophic bacterial production.

|         | N:P <sub>sestonic</sub> |                  | PA                      |                  | Chl <i>a</i>            |                  |
|---------|-------------------------|------------------|-------------------------|------------------|-------------------------|------------------|
|         | <i>F</i> <sub>1,8</sub> | <i>p</i>         | <i>F</i> <sub>1,8</sub> | <i>p</i>         | <i>F</i> <sub>1,8</sub> | <i>p</i>         |
| Rad     | 0.19                    | <b>&lt;0.01</b>  | 3.73                    | 0.08             | 0.15                    | 0.70             |
| P       | 609.3                   | <b>&lt;0.001</b> | 93.89                   | <b>&lt;0.001</b> | 111.5                   | <b>&lt;0.001</b> |
| Rad × P | 1.96                    | 0.20             | 4.92                    | 0.06             | 1.58                    | 0.24             |

12 Table 2S. Results of the two-way analysis of variance (ANOVA) of the interactive effect of  
13 radiation (Rad) and phosphorus (P) addition. Numbers in bold indicate significant interactive  
14 effect between the factors. N:P<sub>sestonic</sub>: nitrogen to phosphorus ratio of the seston on a molar  
15 basis; PA: phytoplanktonic abundance; Chl *a*: chlorophyll *a* concentration.

|                  | PP        |                  | EOC       |                  | HBP       |                  | BA        |                  | CARB      |                  |
|------------------|-----------|------------------|-----------|------------------|-----------|------------------|-----------|------------------|-----------|------------------|
|                  | $F_{1,8}$ | $p$              | $F_{1,8}$ | $p$              | $F_{1,8}$ | $p$              | $F_{1,8}$ | $p$              | $F_{1,8}$ | $p$              |
| Main plot effect |           |                  |           |                  |           |                  |           |                  |           |                  |
| Rad              | 1453      | <b>&lt;0.001</b> | 3669      | <b>&lt;0.001</b> | 1727.85   | <b>&lt;0.001</b> | 34.09     | <b>&lt;0.001</b> | 98.26     | <b>&lt;0.001</b> |
| P                | 9280      | <b>&lt;0.001</b> | 22392     | <b>&lt;0.001</b> | 1.15      | 0.315            | 20.39     | <b>&lt;0.01</b>  | 439.43    | <b>&lt;0.001</b> |
| Rad×P            | 63.12     | <b>&lt;0.001</b> | 4340      | <b>&lt;0.001</b> | 13.52     | <b>&lt;0.01</b>  | 2.77      | 0.134            | 66.67     | <b>&lt;0.001</b> |
| Sub-plot effect  |           |                  |           |                  |           |                  |           |                  |           |                  |
| T                | 1260      | <b>&lt;0.001</b> | 283.42    | <b>&lt;0.001</b> | 62.54     | <b>&lt;0.001</b> | 15.42     | <b>&lt;0.01</b>  | 22.32     | <b>&lt;0.001</b> |
| T×Rad            | 117.6     | <b>&lt;0.001</b> | 31.88     | <b>&lt;0.001</b> | 14.01     | <b>&lt;0.001</b> | 6.65      | <b>&lt;0.05</b>  | 5.33      | <b>&lt;0.05</b>  |
| T×P              | 175.7     | <b>&lt;0.001</b> | 348.58    | <b>&lt;0.001</b> | 72.42     | <b>&lt;0.001</b> | 4.5       | 0.055            | 11.52     | <b>&lt;0.001</b> |
| T×Rad×P          | 357.8     | <b>&lt;0.001</b> | 35.26     | <b>&lt;0.001</b> | 3.47      | 0.056            | 7.96      | <b>&lt;0.05</b>  | 0.54      | 0.59             |

16 **Table 3S.** Results of the repeated three-way analysis of variance (RM-ANOVA) of the interactive effect of radiation (Rad), phosphorus (P)  
17 addition, and temperature (T). Numbers in bold indicate significant interactive effect among the factors from RM-ANOVA (main-plot effect) or  
18 from multivariate tests of Pillai, Hotelling and Roy (sub-plot effect). PP: primary production; EOC: excreted organic carbon; HBP: heterotrophic  
19 bacterial production; BA: bacterial abundance; CARB: photosynthetic carbon required by bacterioplankton.

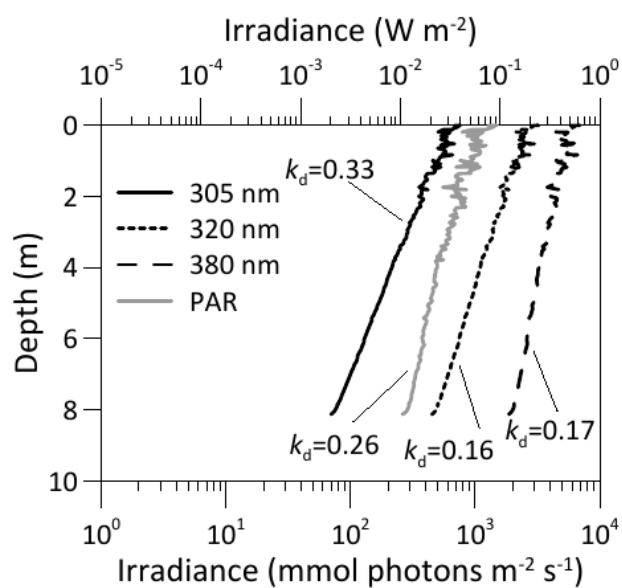

20 **Fig. 1S.** Depth profile of the irradiance in the water column at the beginning of the  
 21 experiment. Irradiance data in the UVR range are expressed in  $\text{W m}^{-2}$ , PAR is in  $\mu\text{mol}$   
 22  $\text{photons m}^{-2} \text{s}^{-1}$ . The diffuse attenuation coefficients ( $k_d$ ) are also shown.

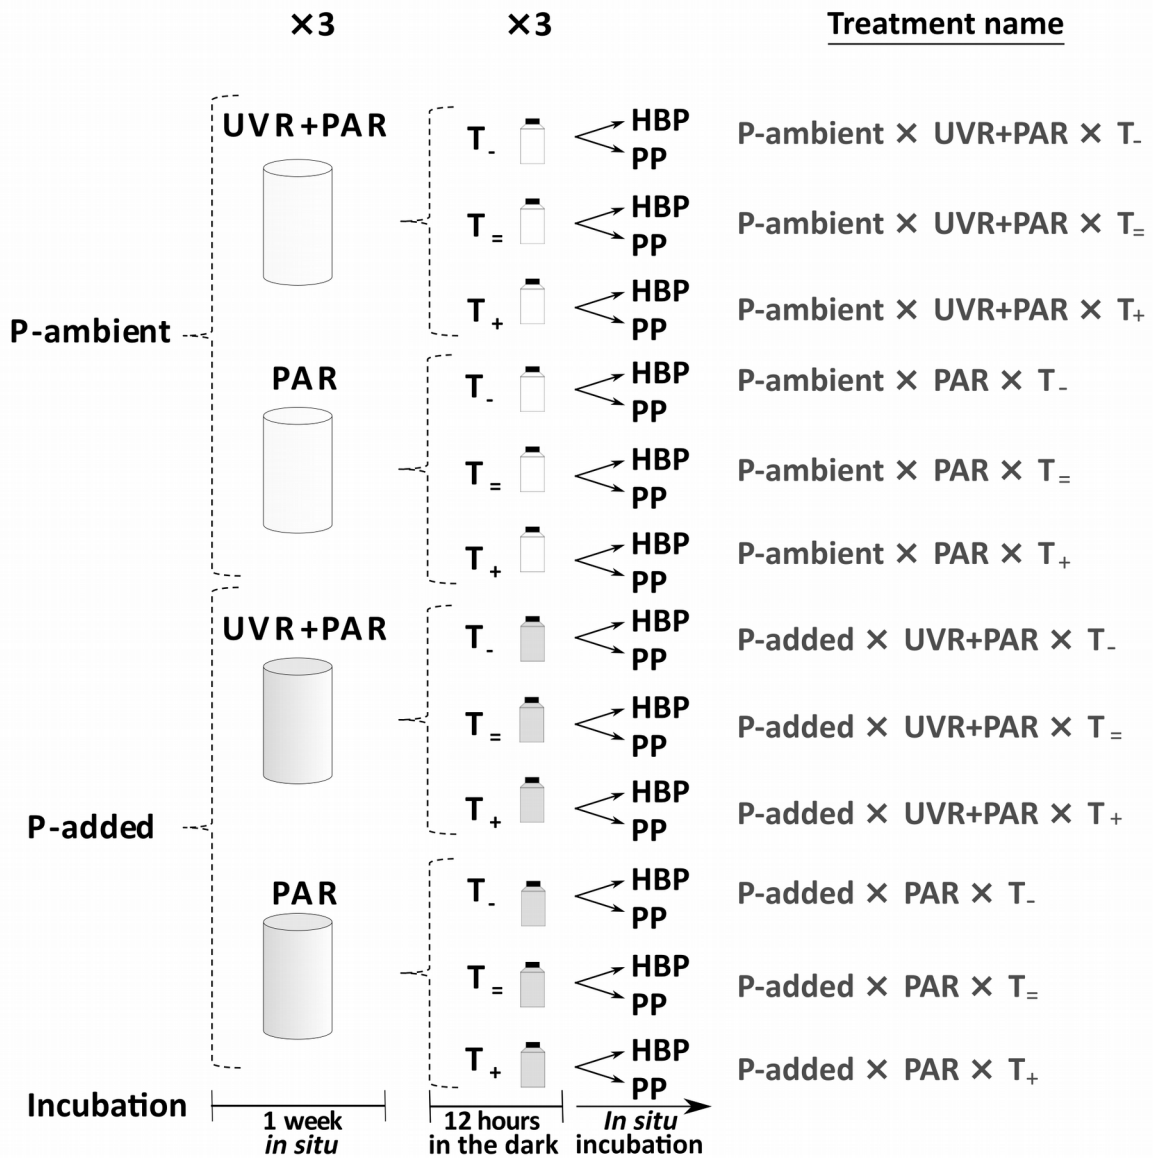

23 **Fig. 2S.** Experimental design and experimental treatments nomenclature. UVR+PAR: full  
 24 sunlight. PAR: photosynthetically active radiation. P-ambient: ambient phosphorus (P)  
 25 concentration. P-added: increased P concentration. T<sub>-</sub>: 5°C below ambient temperature. T<sub>=</sub> :  
 26 ambient temperature. T<sub>+</sub>: 5°C above ambient temperature. HBP: heterotrophic bacterial  
 27 production. PP: primary production. Samples were incubated (triplicate) *in situ* during 90  
 28 min for HBP and 5h for PP.

29 **Supplementary text 1S**

30 A large sample size (pairs irradiance-depth values,  $n > 160$ ) was used, and a good fit ( $R^2 >$   
31 0.95) was found for all regressions.

32 **Supplementary text 2S**

33 DIN was considered the sum of nitrate ( $\text{NO}_3^-$ ), nitrite ( $\text{NO}_2^-$ ), and ammonium ( $\text{NH}_4^+$ ).  $\text{NO}_3^-$   
34 was analysed by UV spectrophotometric screening,  $\text{NO}_2^-$  was determined using the  
35 sulphanilamide method, and  $\text{NH}_4^+$  by the phenol-hypochlorite method<sup>1</sup>. Total nitrogen (TN)  
36 and TP were determined by analysing 50-mL aliquots after digestion with a mixture of  
37 potassium persulfate, boric acid, and sodium hydroxide at 120°C for 30 min<sup>1</sup>.  $\text{NO}_3^-$  and  
38 phosphate concentrations in the digested samples were measured following Grasshoff et al.<sup>2</sup>.

39 **Supplementary text 3S**

40 A Perkin-Elmer model 2400 CHN elemental analyser (Perkin-Elmer Corporation, Waltham,  
41 Massachusetts, USA) was used for samples analysis.

42 **Supplementary text 4S**

43 Samples were thawed and placed in centrifuge tubes (15 mL) with 5 mL of acetone (90%) for  
44 24 h in the dark at 4°C. Next, the samples were centrifuged, and the fluorescence of the  
45 supernatant was measured with a fluorimeter (LS 55 Perkin Elmer, USA). A Chl *a* standard  
46 (Chl *a* from spinach, Sigma) was used to transform the fluorescence data into Chl *a*  
47 concentrations.

48 **Supplementary text 5S**

49 To quantify PA, 50 mL aliquots were settled in Uthermöhl chambers of 2.6 cm diameter for  
50 48 h to ensure complete sedimentation of the smallest algal species. Cells were counted in

51 100 randomly selected fields of view at 1000× magnification under an inverted microscope.  
52 At least 600 cells of the most abundant algal species were counted in each sample.

53 **Supplementary text 6S**

54 Water samples were fixed with neutralized formaldehyde (2%), stained with DAPI to a final  
55 concentration of 2.5  $\mu\text{g mL}^{-1}$ , and then filtered through a 0.2- $\mu\text{m}$  pore-size black  
56 polycarbonate Nucleopore Filter. At least 400 cells per sample were counted by  
57 epifluorescence microscopy at 1000× magnification (Karl Zeiss AX10).

58 **Supplementary text 7S**

59 Aliquots of 1.5 ml were taken from each replicate and placed in microcentrifuge vials. TCA  
60 cold extraction was performed by keeping the vials in ice for 20 min, after which the  
61 precipitate was collected by centrifugation (at 16,000g for 10 min). Then, vials were rinsed  
62 twice with 1.5 mL of 5% TCA to remove any residual unincorporated radioactivity, and  
63 scintillation liquid (Ecoscint A) was added for subsequent measurement in an autocalibrated  
64 scintillation counter (Beckman LS 6000TA)<sup>3</sup>. The conversion factor  $1 \times 10^{18}$  cell mol<sup>-1</sup><sup>4</sup> was  
65 used to estimate the number of bacteria produced per mol of incorporated thymidine. The  
66 factor  $2 \times 10^{-14}$  g C cell<sup>-1</sup><sup>5</sup> was applied to estimate the amount of carbon.

67 **Supplementary text 8S**

68 The <sup>14</sup>C measured on the 1 $\mu\text{m}$  filters represents the <sup>14</sup>C incorporated into phytoplankton cells  
69 (PP). Because of the absence of autotrophic picoplankton in this lake, the <1  $\mu\text{m}$  filtrate  
70 collected on the 0.2  $\mu\text{m}$  filters represents the <sup>14</sup>C incorporated into the heterotrophic  
71 bacterioplankton cells (<sup>14</sup>C-Bact) through the bacterial use of EOC. Thus, the <1  $\mu\text{m}$  filtrate  
72 (fraction >0.2  $\mu\text{m}$  + filtrate <0.2  $\mu\text{m}$ ) represents EOC. For measurement of the EOC fraction



73 in filtrate <0.2  $\mu\text{m}$ , we collected aliquots of 4 mL from the filtrate <0.2  $\mu\text{m}$  and they were put  
74 into scintillation vials. Filters for PP determination (1 $\mu\text{m}$  filters) and  $^{14}\text{C}$ -Bact (0.2  $\mu\text{m}$  filters),  
75 were put into scintillation vials. Inorganic carbon from scintillation vials was removed by  
76 adding 100  $\mu\text{L}$  of 1 N HCl and allowing the vial to remain open in a hood for 24 h. After  
77 acidification, a scintillation cocktail (Ecoscint A) was added to all the samples. The amount  
78 of carbon was determined from the disintegrations per min (dpm), counted with a scintillation  
79 counter equipped with autocalibration (Beckman LS 6000TA). In all calculations, dark values  
80 were subtracted from corresponding light values.

81 CARB may be an upper estimate of the actual bacterial demand for photosynthetic carbon  
82 because respired carbon is not included in the  $^{14}\text{C}$ -Bact variable and steady state and  $^{14}\text{C}$ -  
83 isotopic equilibrium with the autochthonous pool is assumed; therefore, the denominator (i.e.  
84  $^{14}\text{C}\text{-Bact} \times \text{EOC}^{-1}$ ) can be underestimated<sup>6</sup>.

## 85 **References**

1. APHA. *Standard methods for the examination of water and wastewater*. (American Public Health Association, 1992).
2. Grasshoff K., Ehrhardt M. & Kremling K. *Methods of seawater analysis*. (Verl. Chem., Weinheim, 1999).
3. Smith D. C. & Azam F. A simple, economical method for measuring bacterial protein synthesis rates in seawater using  $^3\text{H}$ -leucine. *Mar. Microb. Food Webs* **6**, 107–114 (1992).
4. Bell R. T. Estimating production of heterotrophic bacterioplankton via incorporation of tritiated thymidine. in *Handbook of methods in aquatic microbial ecology* 495–503 (Lewis, 1993).
5. Lee S. & Fuhrman J. A. Relationships between biovolume and biomass of naturally derived marine bacterioplankton. *Deep Sea Res. Part B Oceanogr. Lit. Rev.* **34**, 1069 (1987).
6. Medina-Sánchez, J. M., Villar-Argaiz, M. & Carrillo, P. Solar radiation-nutrient interaction enhances the resource and predation algal control on bacterioplankton: A short-term

experimental study. *Limnol. Oceanogr.* **51**, 913–924 (2006).
